# Supplementary material for: β-NiMoO4nanowire arrays grown on carbon cloth for 3D solid asymmetry supercapacitors
Source: Royal Society of Chemistry journal article supplement (doi:10.1039/c5ra14704b), 2015-01-01
Supplement: c5ra14704b2.pdf [file c5ra14704b2.pdf]

Supporting information for

**$\beta$ -NiMoO<sub>4</sub> nanowire arrays grown on carbon cloth for 3D solid  
asymmetry supercapacitor**

Chuanshen Wang, Yi Xi,\* Chenguo Hu, Shuge Dai, Mingjun Wang, Lu Cheng,  
Weina Xu, Guo Wang and Wenlong Li

Department of Applied Physics, Chongqing University, Chongqing, 400044, P.R.  
China

**Content:**

The contents of Supporting Information includes the following:

- (1) SEM image of the  $\beta$ -NiMoO<sub>4</sub> NW arrays at 100 °C, naked carbon cloth, and CV curves and GCD curves of pure carbon cloth.
- (2) Electrochemical characterizations of the  $\beta$ -NiMoO<sub>4</sub> NW arrays grown on carbon cloth CV curves of at various scan rates on different reaction hours (5 h, 8 h, 11 h) and CV curve of at the scan rate of 200 mV/S.
- (3) GCD curves at different time (5 h, 8 h, 11 h) at the temperature of 140 °C, charging time curves of supercapacitor which lighted one LED.
- (4) The video of the supercapacitor to light one LED.

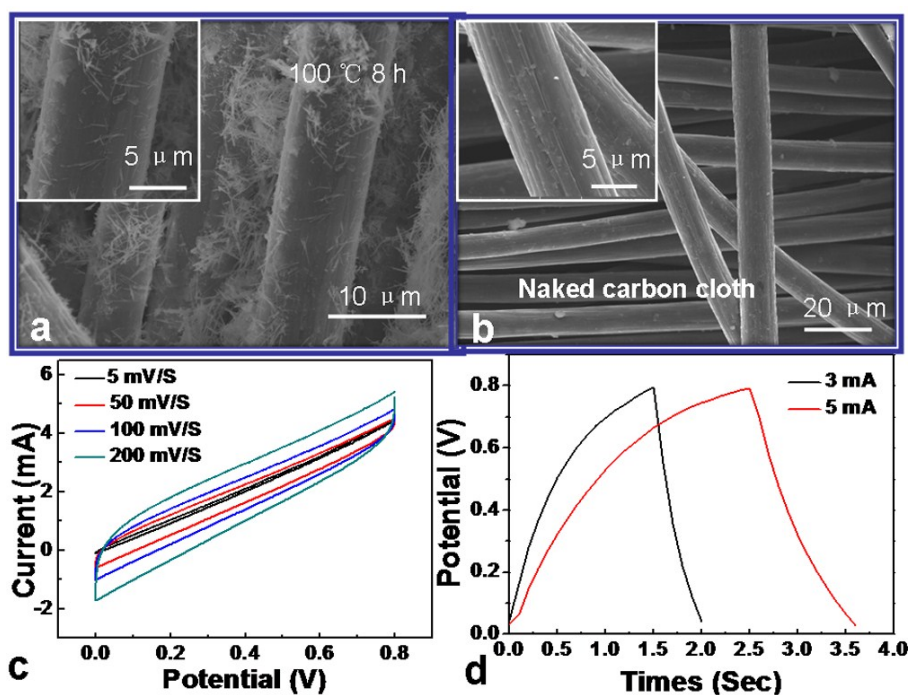

Figure S1 (a) SEM image of the  $\beta$ -NiMoO<sub>4</sub> NW arrays at 100 °C. (b) Naked carbon cloth. (c) and (d) CV curves and GCD curves of pure carbon cloth.

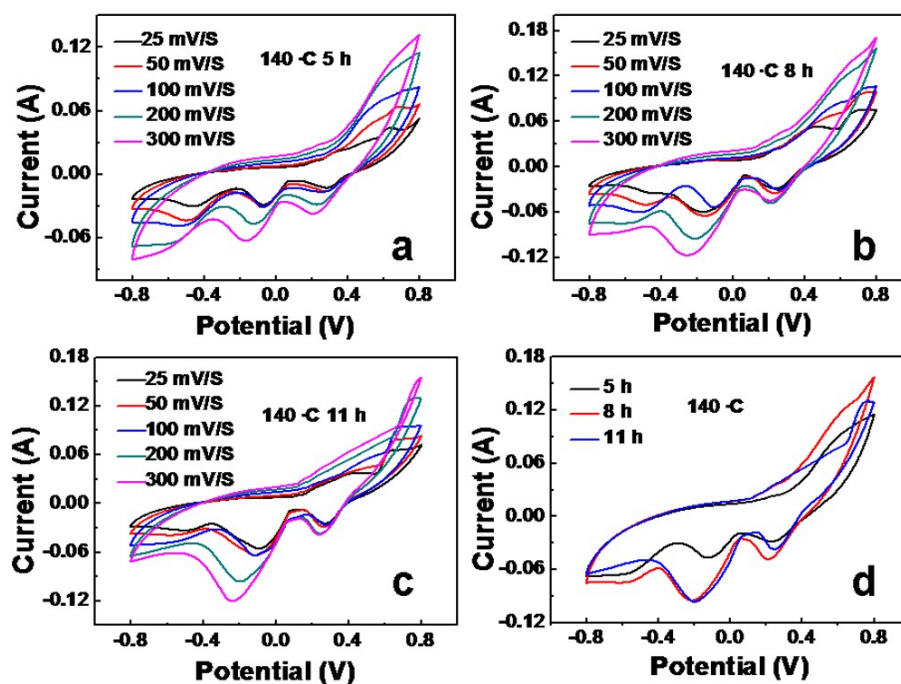

**Figure S2** (a), (b) and (c) CV curves of electrochemical characterizations of the  $\beta$ -NiMoO<sub>4</sub> NW arrays grown on carbon cloth at various scan rates on different reaction hours (5 h, 8 h, 11 h), and (d) CV curve of (b) at the scan rate of 200 mV/S.

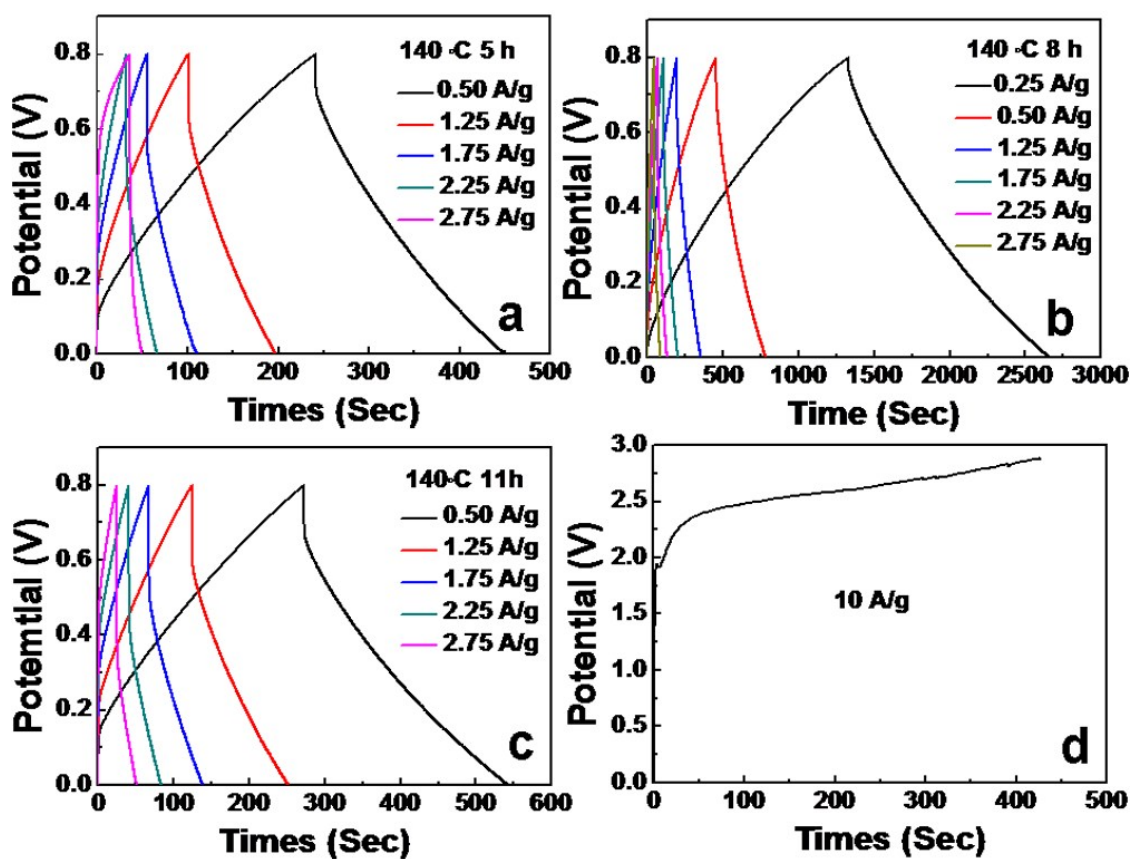

Figure S3 (a), (b) and (c) GCD curves at different time (5 h, 8 h, 11 h) at the temperature of 140 °C, (d) Charging time curves of supercapacitors which lighted a LED.

**Figure S4** The video of the supercapacitor to light one LED.
